# Supplementary material for: Identification of Compounds from the Water Soluble Extract of Cinnamomum cassia Barks and Their Inhibitory Effects against High-Glucose-Induced Mesangial Cells
Source: MDPI journal article supplement (doi:10.3390/molecules180910930), 2013-09-05

# Supplementary Materials

## Contents

- S1.**  $^1\text{H}$ -NMR spectrum of compound **1** in  $\text{DMSO-}d_6$ .
- S2.**  $^{13}\text{C}$ -NMR spectrum of compound **1** in  $\text{DMSO-}d_6$ .
- S3.** HSQC spectrum of compound **1** in  $\text{DMSO-}d_6$ .
- S4.** HMBC spectrum of compound **1** in  $\text{DMSO-}d_6$ .
- S5.**  $^1\text{H-}^1\text{H}$  COSY spectrum of compound **1** in  $\text{DMSO-}d_6$ .
- S6.** ROESY spectrum of compound **1** in  $\text{DMSO-}d_6$ .
- S7.**  $^1\text{H}$  NMR spectrum of compound **2** in  $\text{CD}_3\text{OD}$ .
- S8.**  $^{13}\text{C}$ -NMR spectrum of compound **2** in  $\text{CD}_3\text{OD}$ .
- S9.** HSQC spectrum of compound **2** in  $\text{CD}_3\text{OD}$ .
- S10.** HMBC spectrum of compound **2** in  $\text{CD}_3\text{OD}$ .
- S11.**  $^1\text{H-}^1\text{H}$  COSY spectrum of compound **2** in  $\text{CD}_3\text{OD}$ .
- S12.** ROESY spectrum of compound **2** in  $\text{CD}_3\text{OD}$ .
- S13.**  $^1\text{H}$ -NMR spectrum of compound **3** in  $\text{CD}_3\text{OD}$ .
- S14.**  $^{13}\text{C}$ -NMR spectrum of compound **3** in  $\text{CD}_3\text{OD}$ .
- S15.** HSQC spectrum of compound **3** in  $\text{CD}_3\text{OD}$ .
- S16.** HMBC spectrum of compound **3** in  $\text{CD}_3\text{OD}$ .
- S17.**  $^1\text{H-}^1\text{H}$  COSY spectrum of compound **3** in  $\text{CD}_3\text{OD}$ .

**Figure S1.**  $^1\text{H}$ -NMR spectrum of compound **1** in  $\text{DMSO}-d_6$ .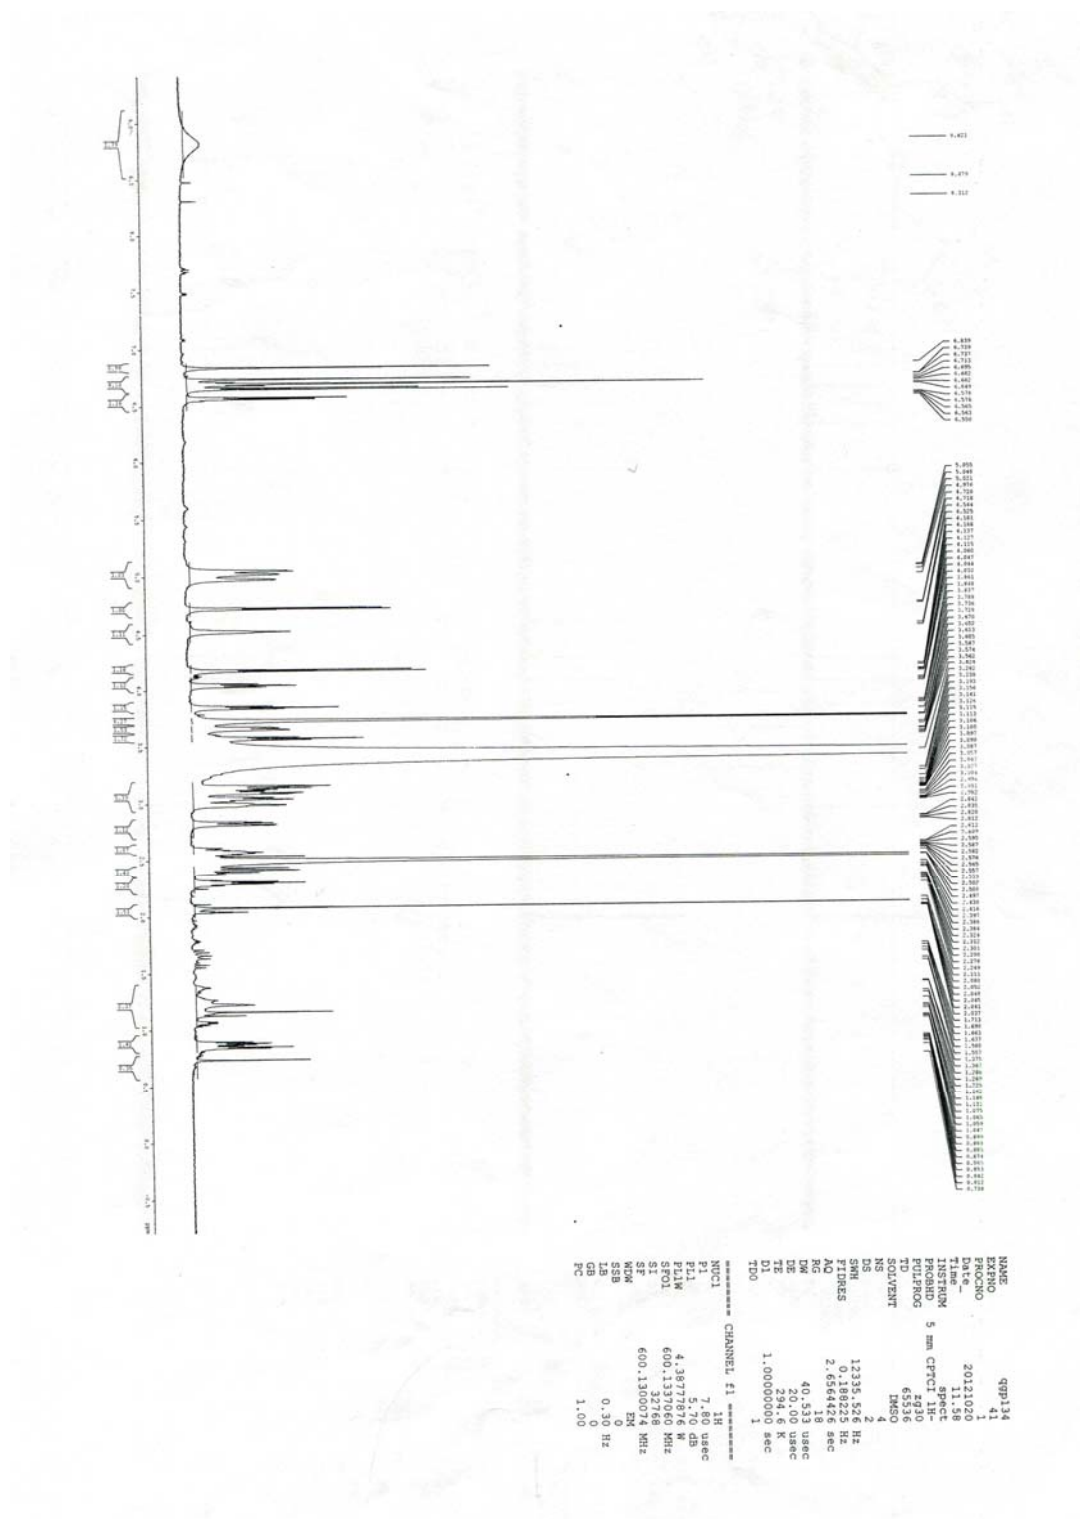

Figure S2.  $^{13}\text{C}$ -NMR spectrum of compound 1 in  $\text{DMSO}-d_6$ .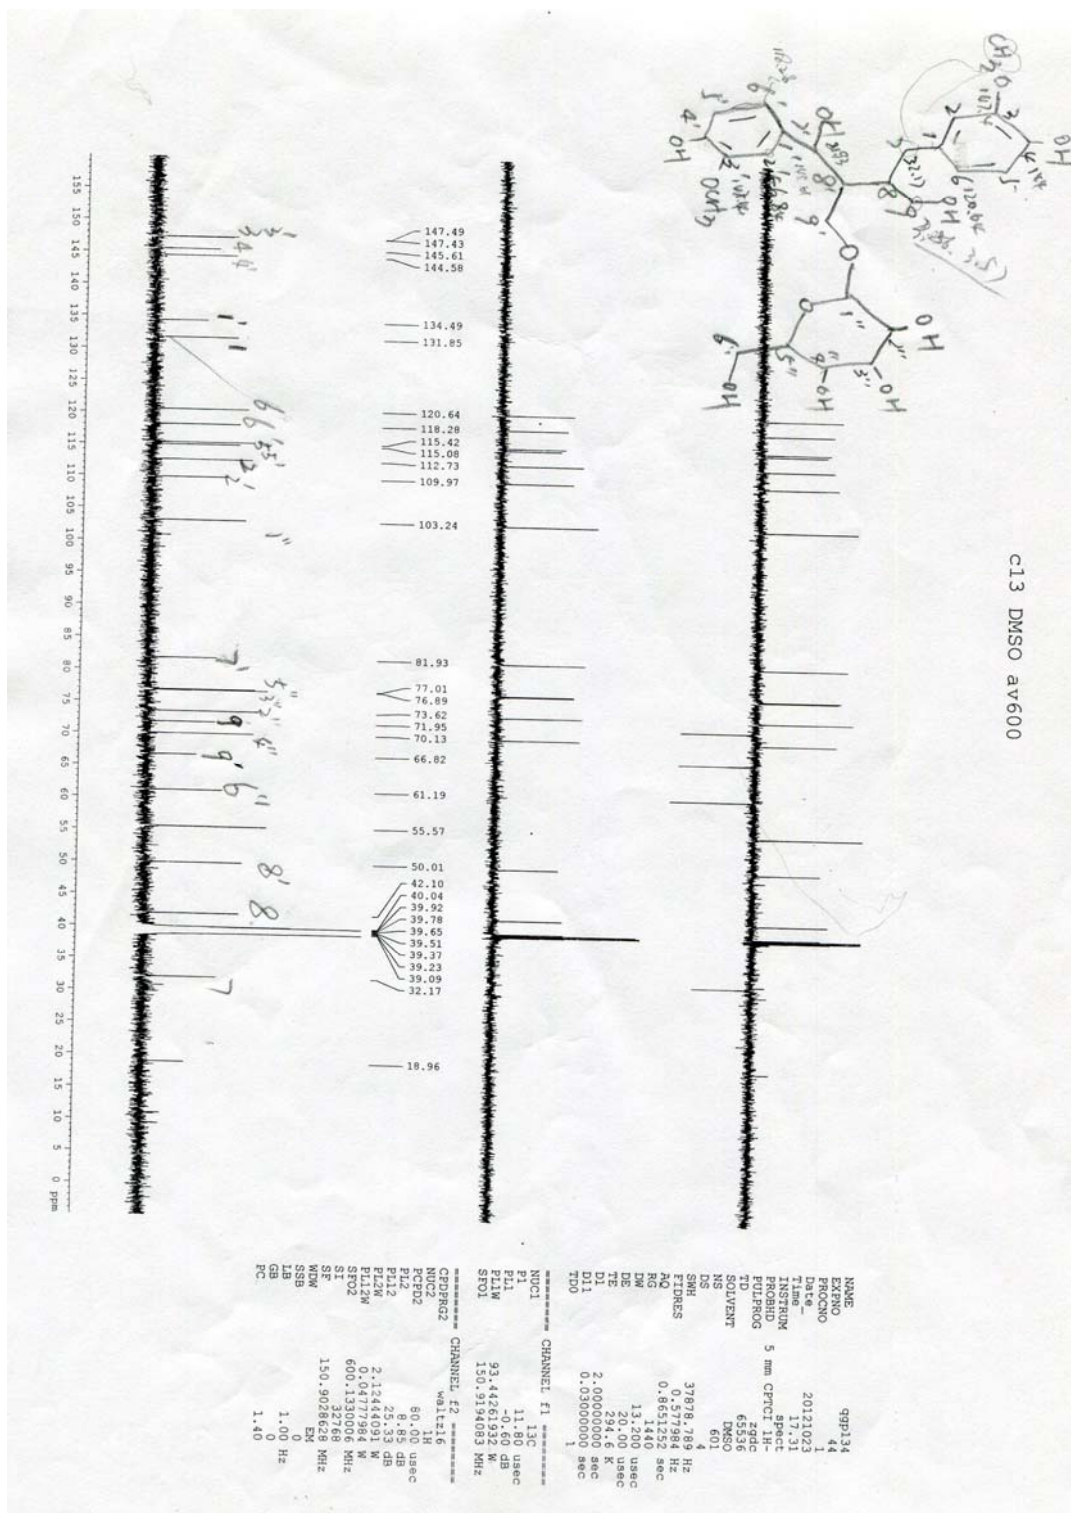

**Figure S3** HSQC spectrum of compound **1** in DMSO- $d_6$ 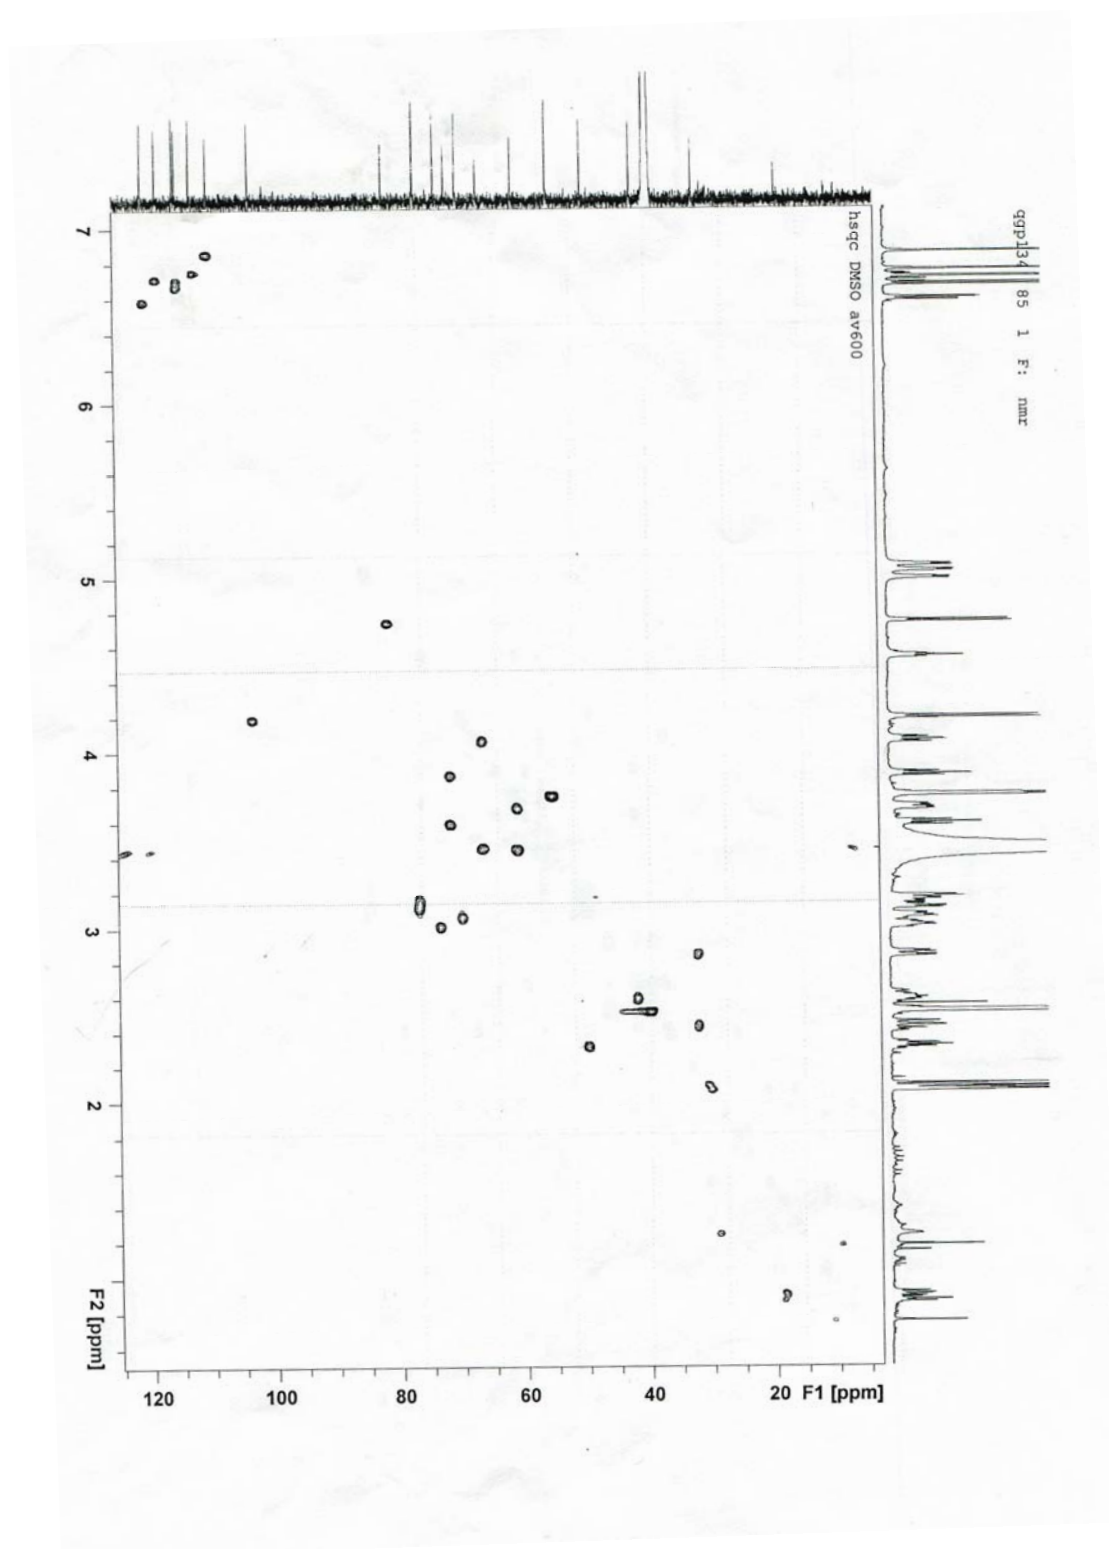

**Figure S4.** HMBC spectrum of compound **1** in DMSO- $d_6$ .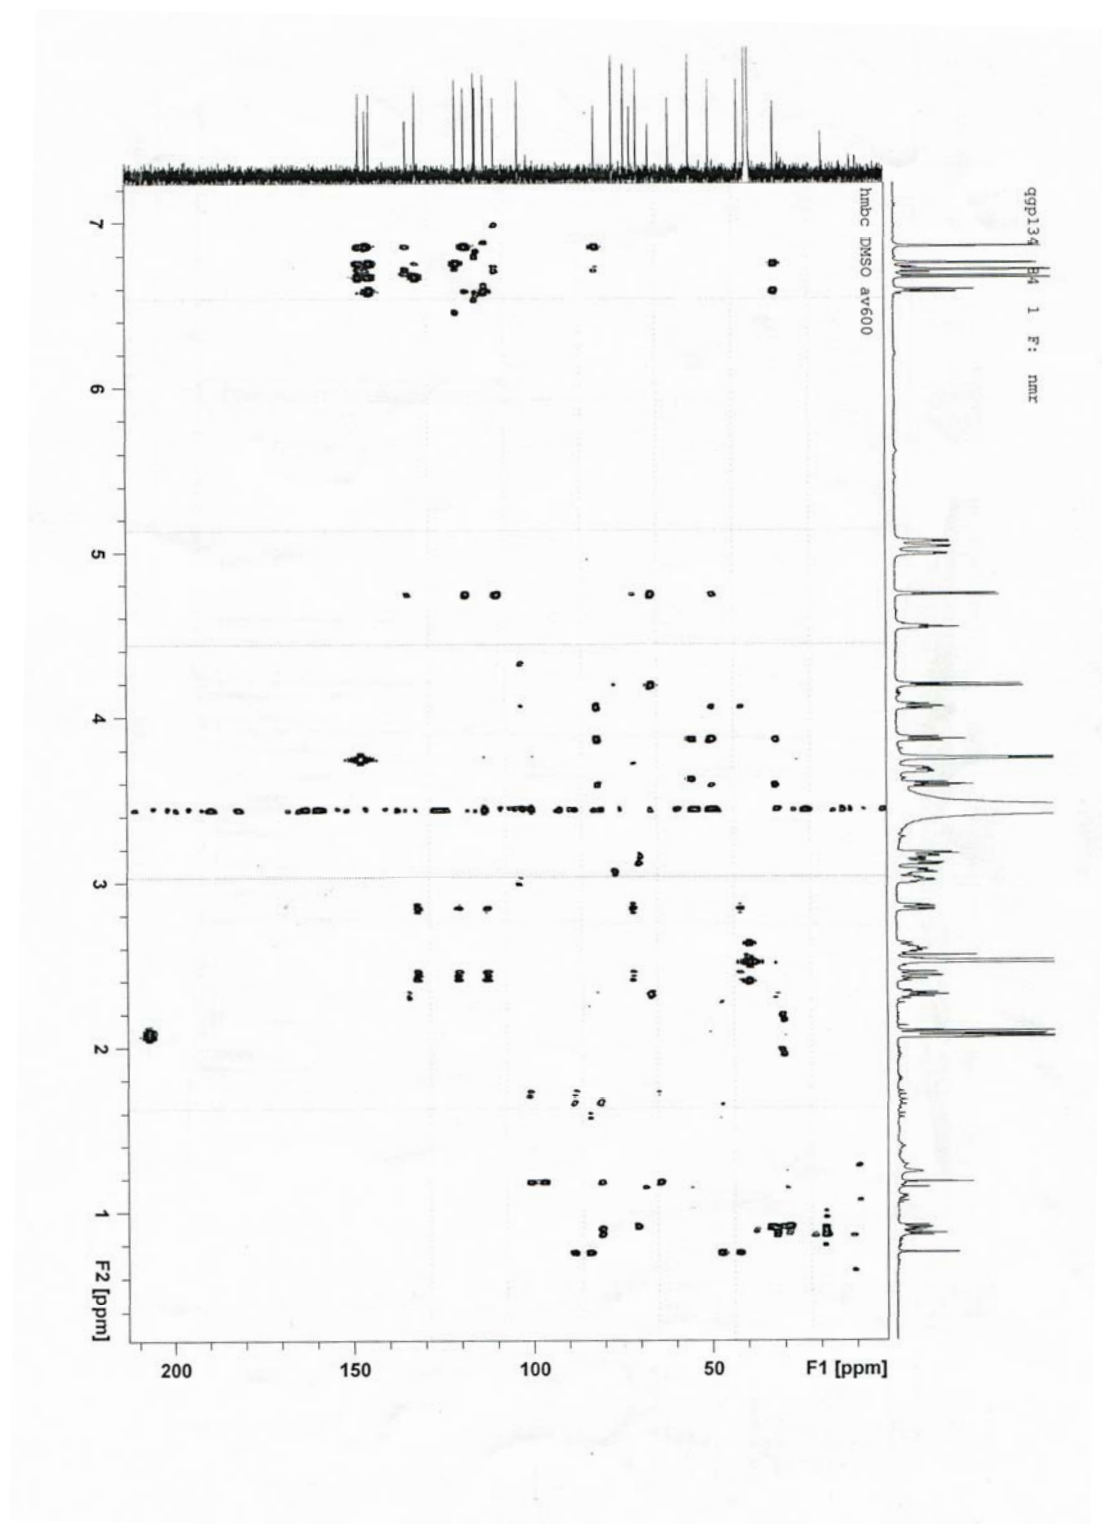

**Figure S5.**  $^1\text{H}$ - $^1\text{H}$  COSY spectrum of compound **1** in  $\text{DMSO}-d_6$ .

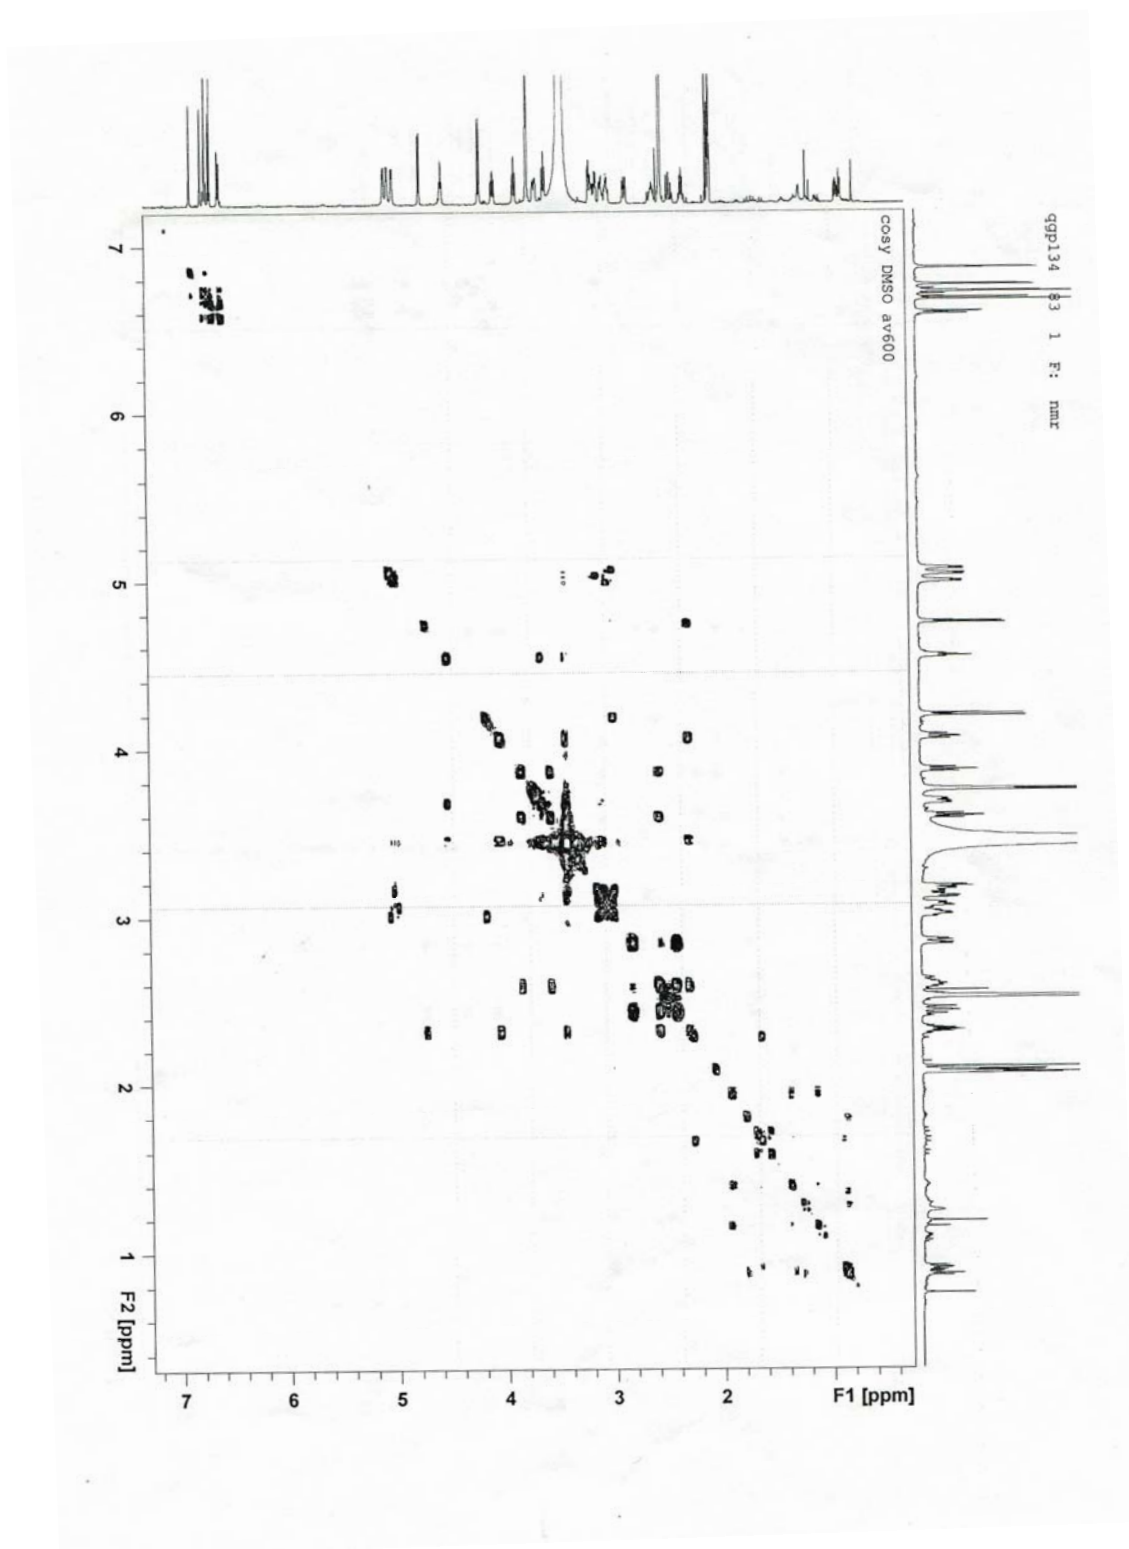



**Figure S6.** ROESY spectrum of compound **1** in DMSO- $d_6$ .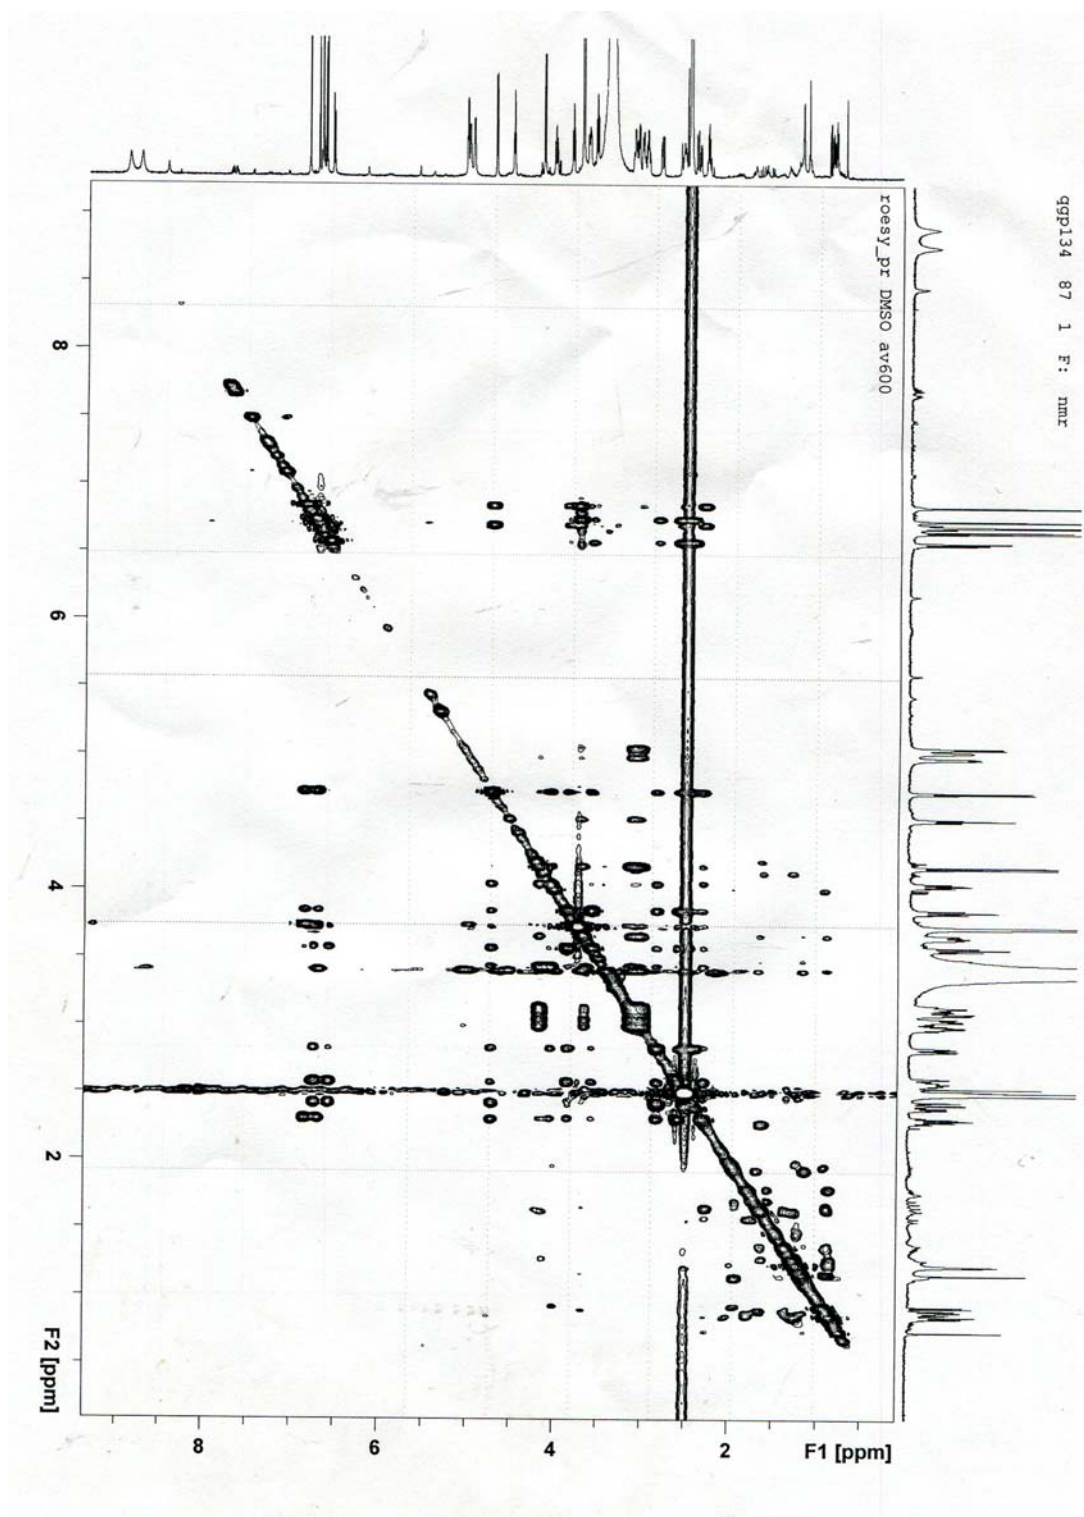

Figure S7.  $^1\text{H}$ -NMR spectrum of compound 2 in  $\text{CD}_3\text{OD}$ .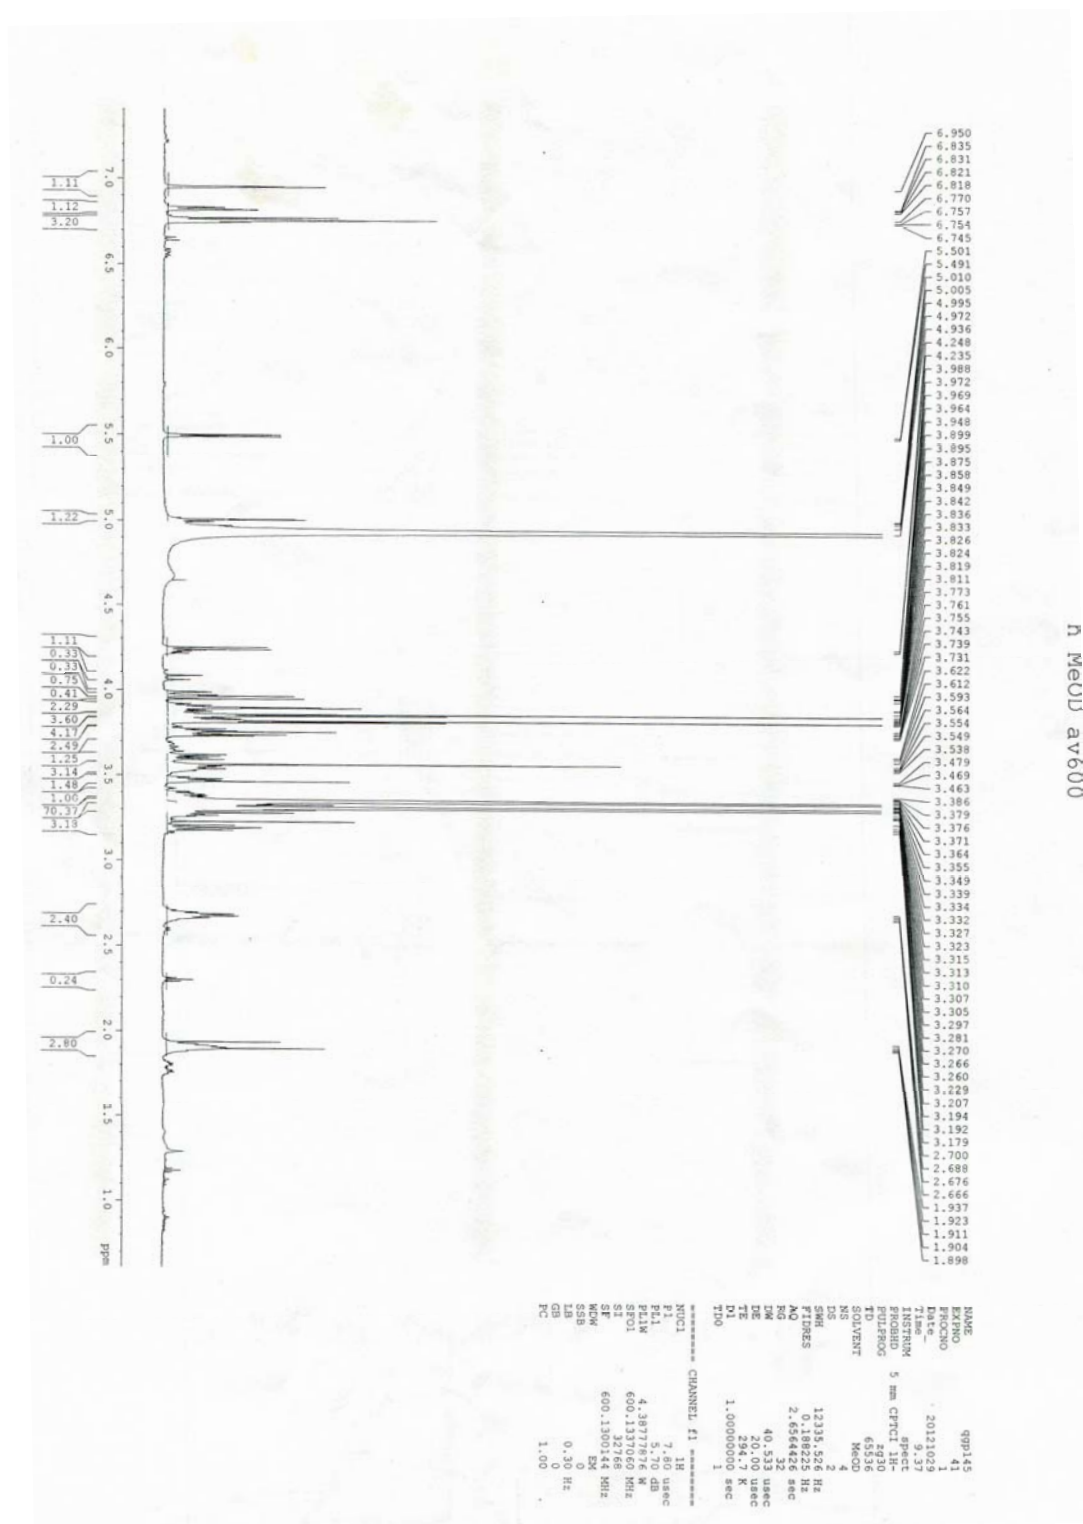



**Figure S8.**  $^{13}\text{C}$ -NMR spectrum of compound **2** in  $\text{CD}_3\text{OD}$ .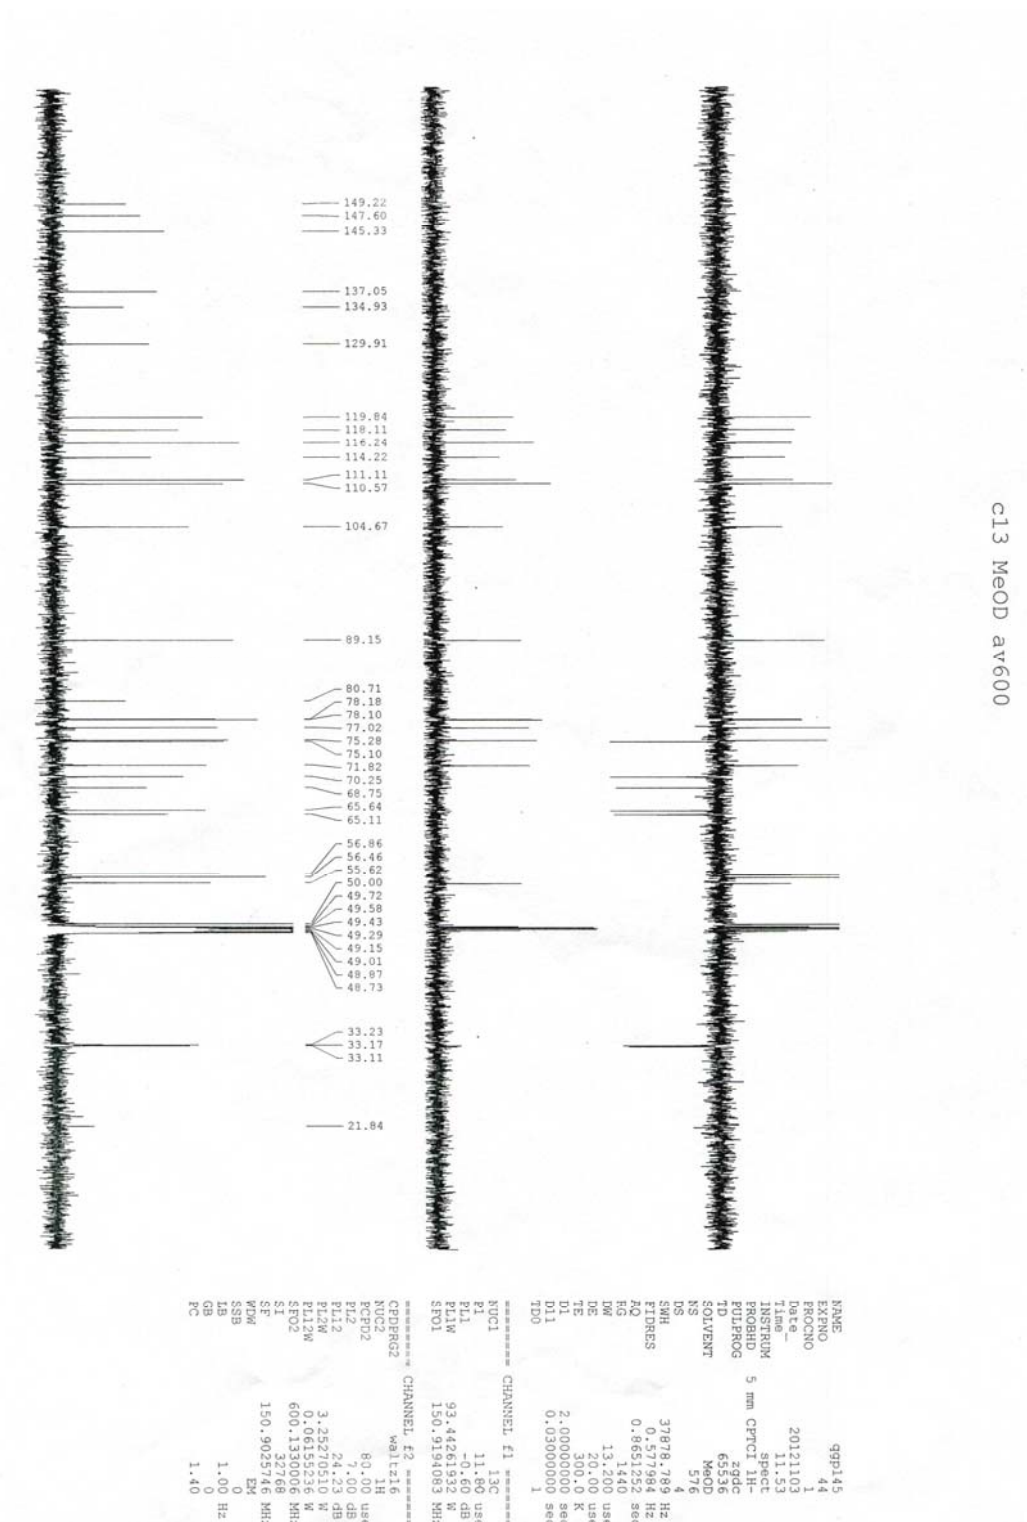

**Figure S9.** HSQC spectrum of compound **2** in CD<sub>3</sub>OD.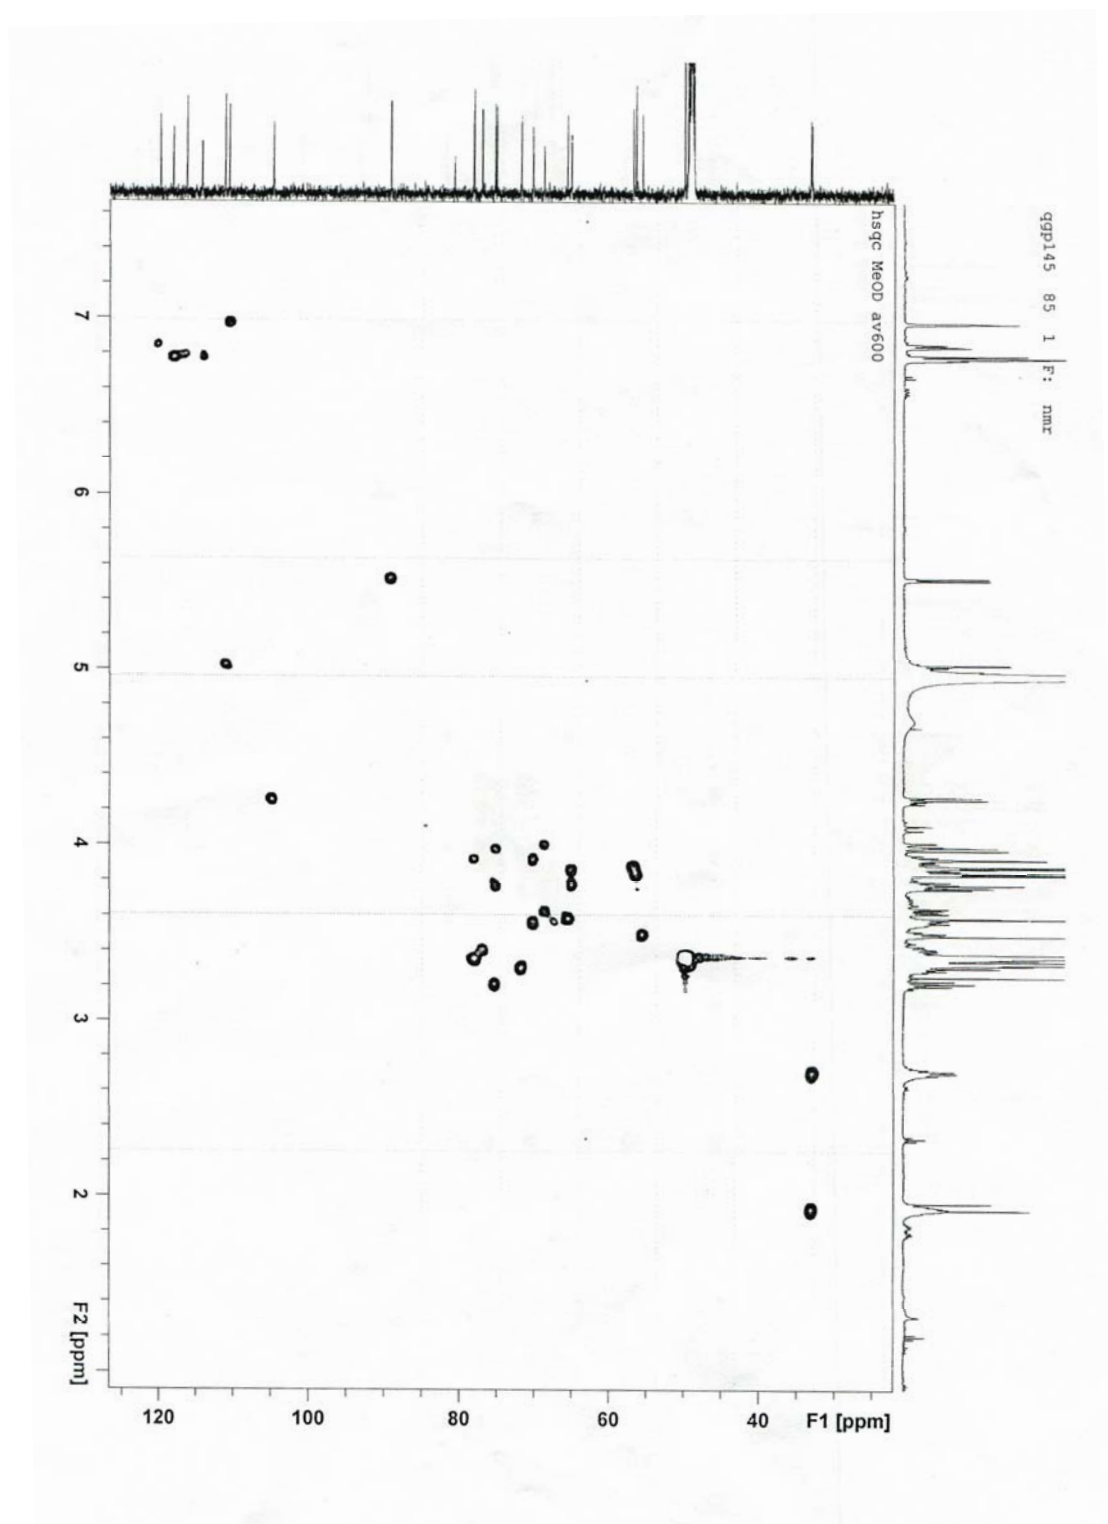

**Figure S10.** HMBC spectrum of compound **2** in CD<sub>3</sub>OD.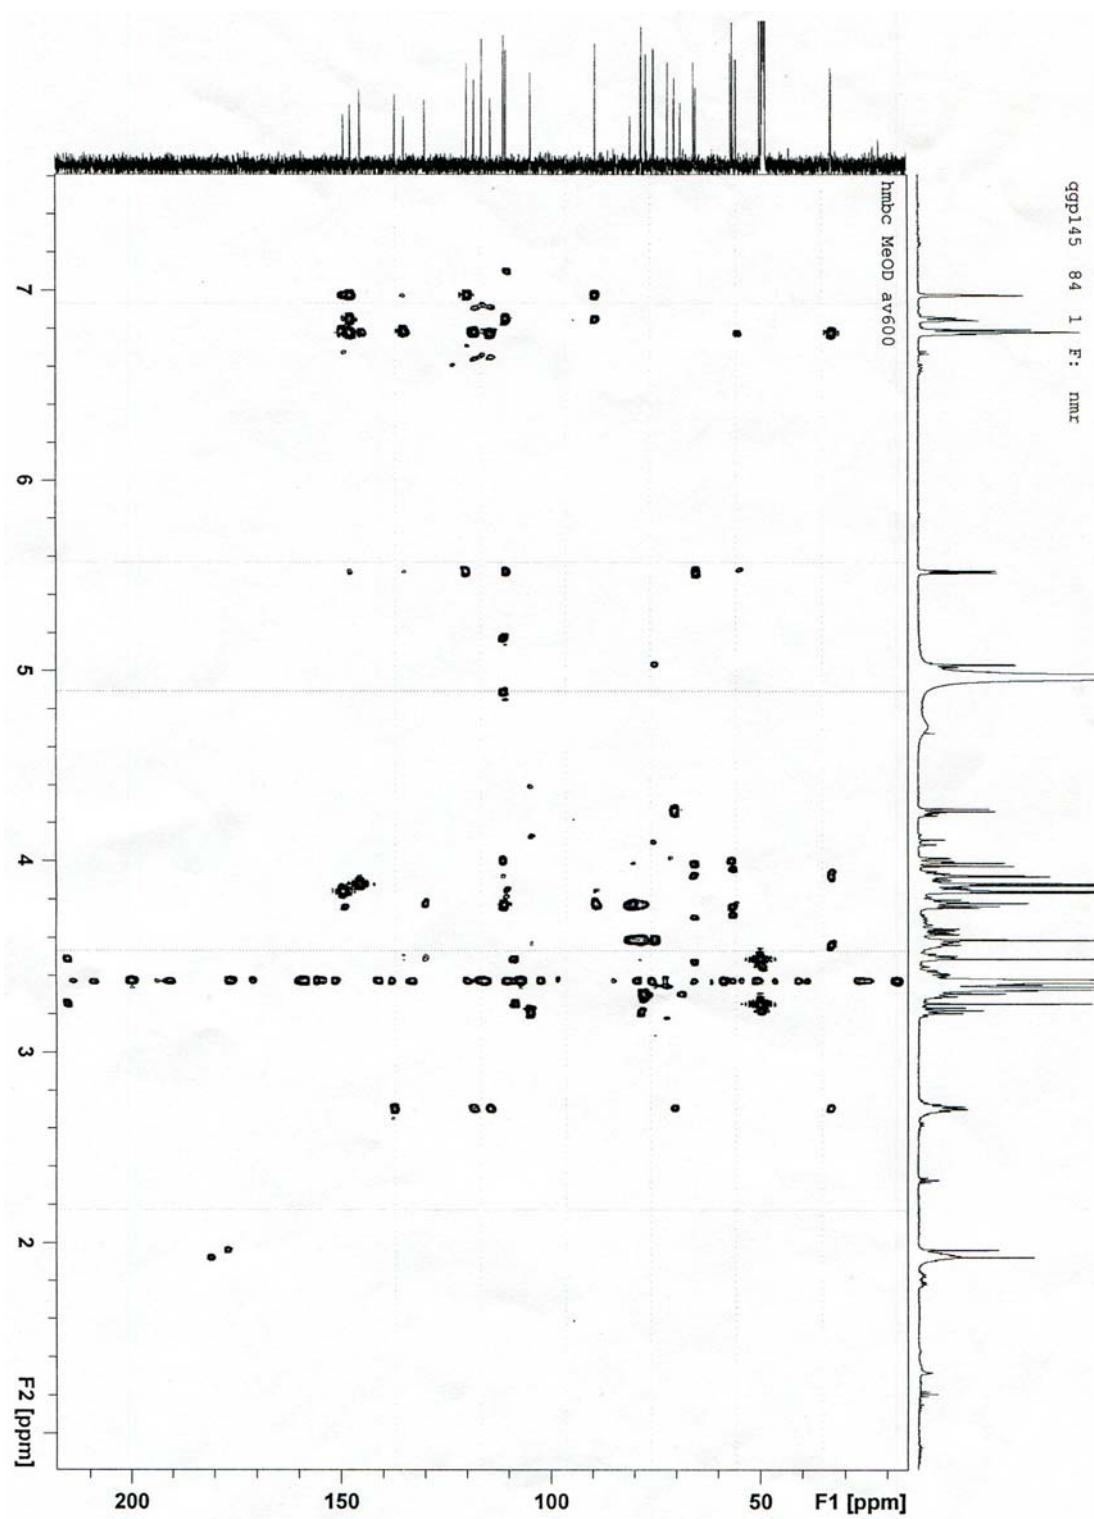

**Figure S11.**  $^1\text{H}$ - $^1\text{H}$  COSY spectrum of compound **2** in  $\text{CD}_3\text{OD}$ .

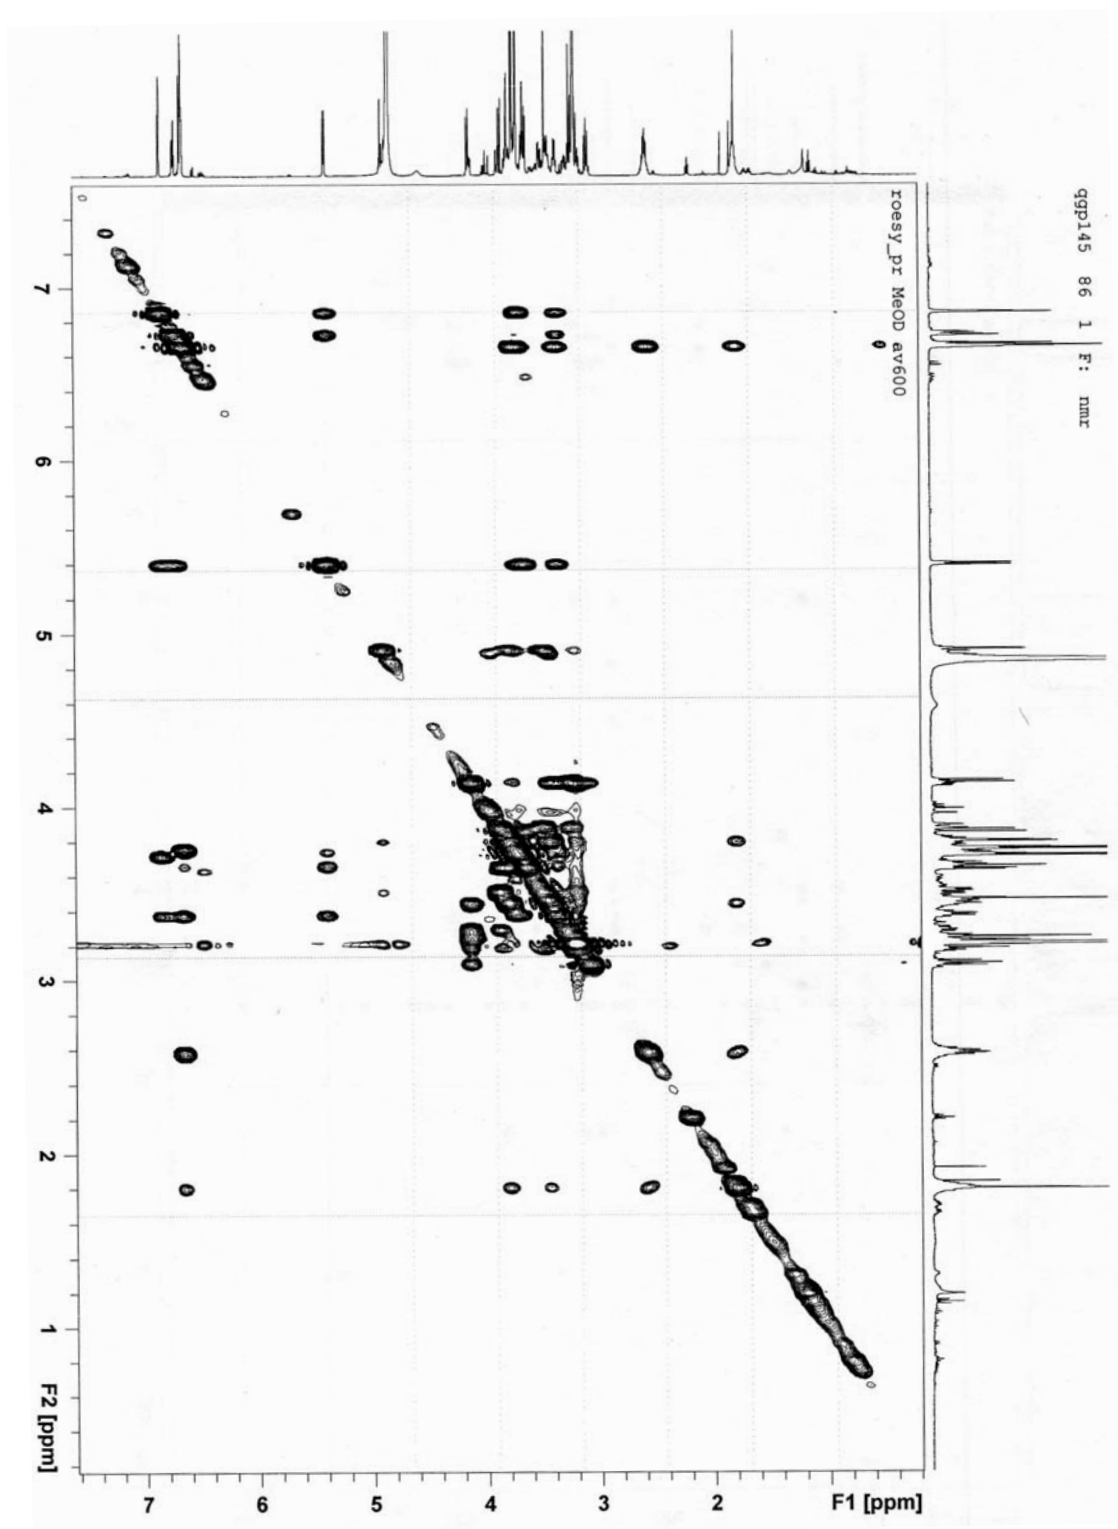

**Figure S12.** ROESY spectrum of compound **2** in CD<sub>3</sub>OD.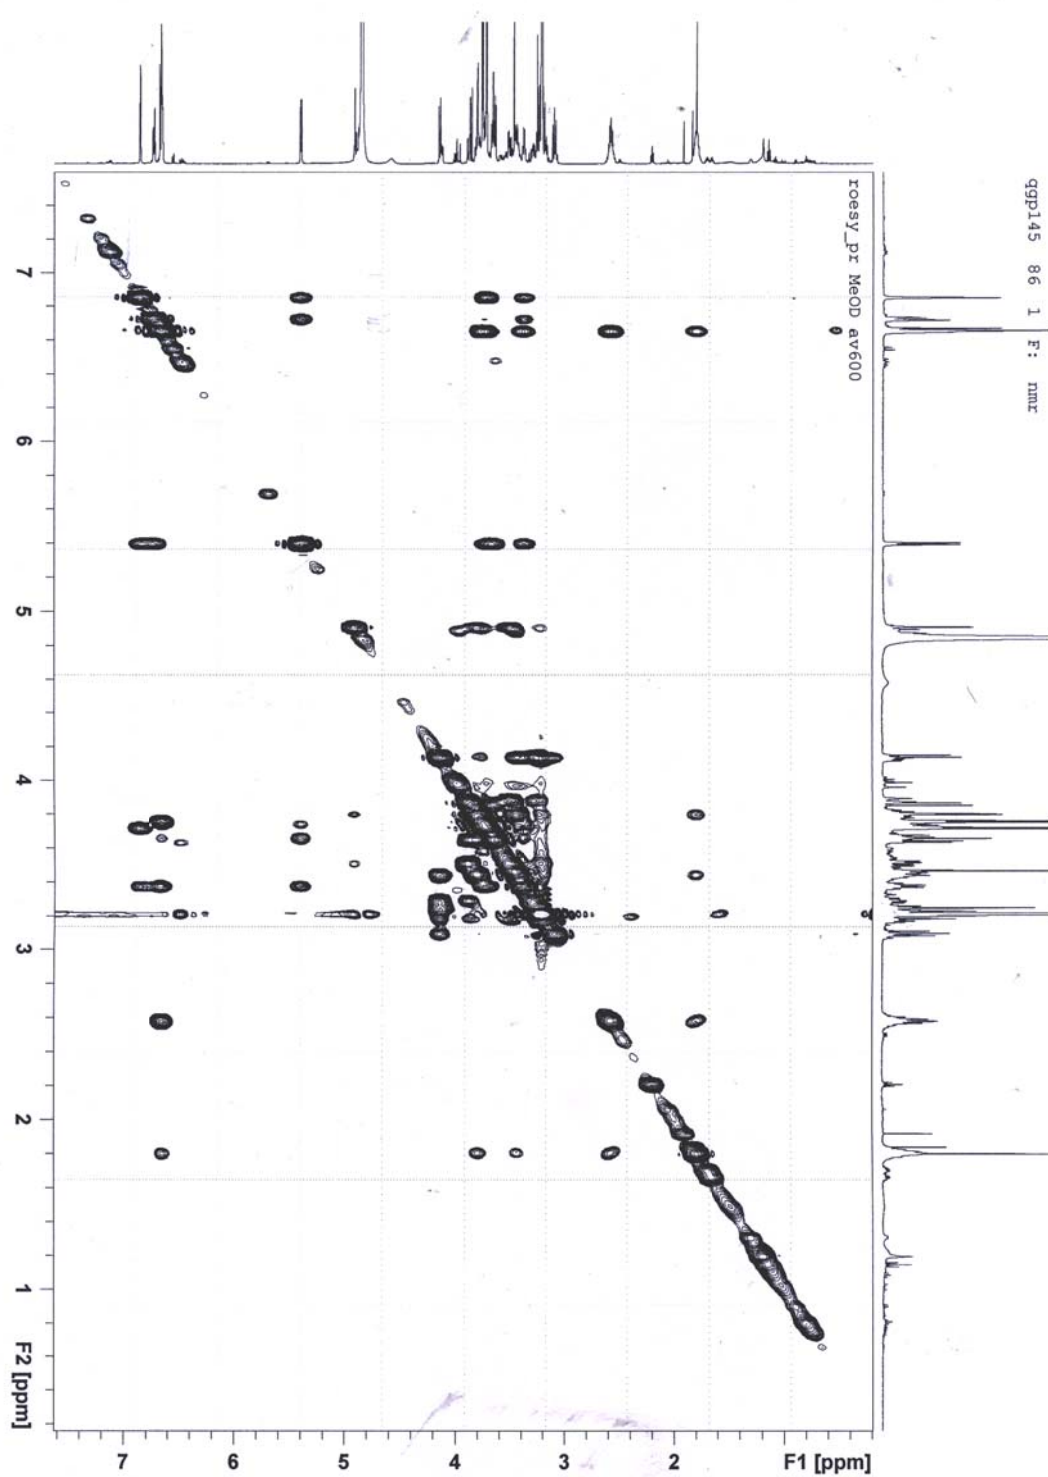

Figure S13.  $^1\text{H}$ -NMR spectrum of compound **3** in  $\text{CD}_3\text{OD}$ .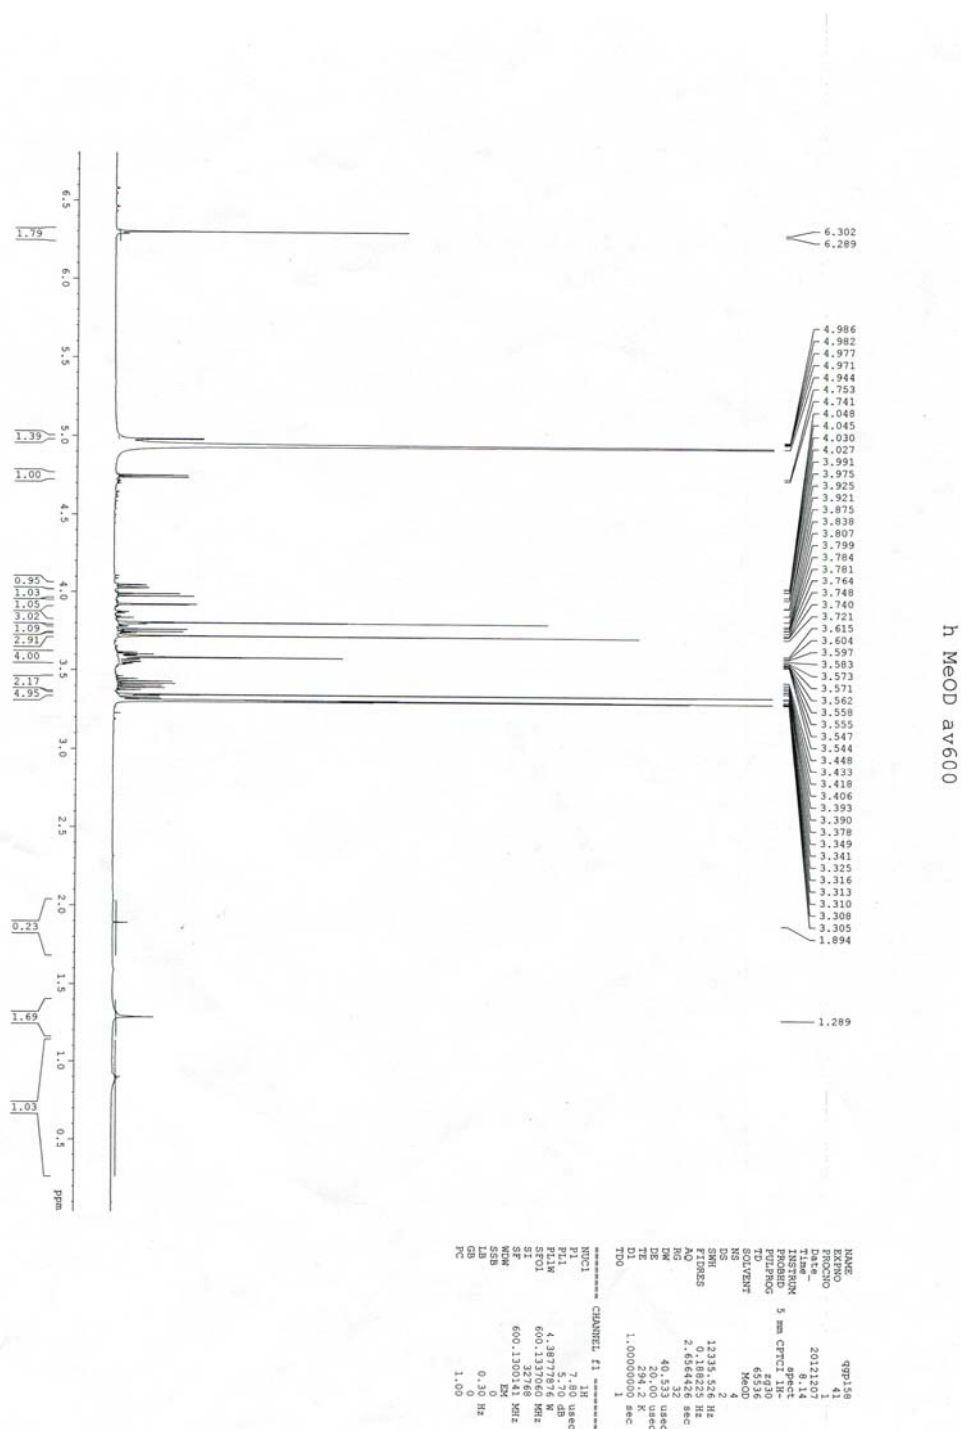



Figure S14.  $^{13}\text{C}$ -NMR spectrum of compound 3 in  $\text{CD}_3\text{OD}$ .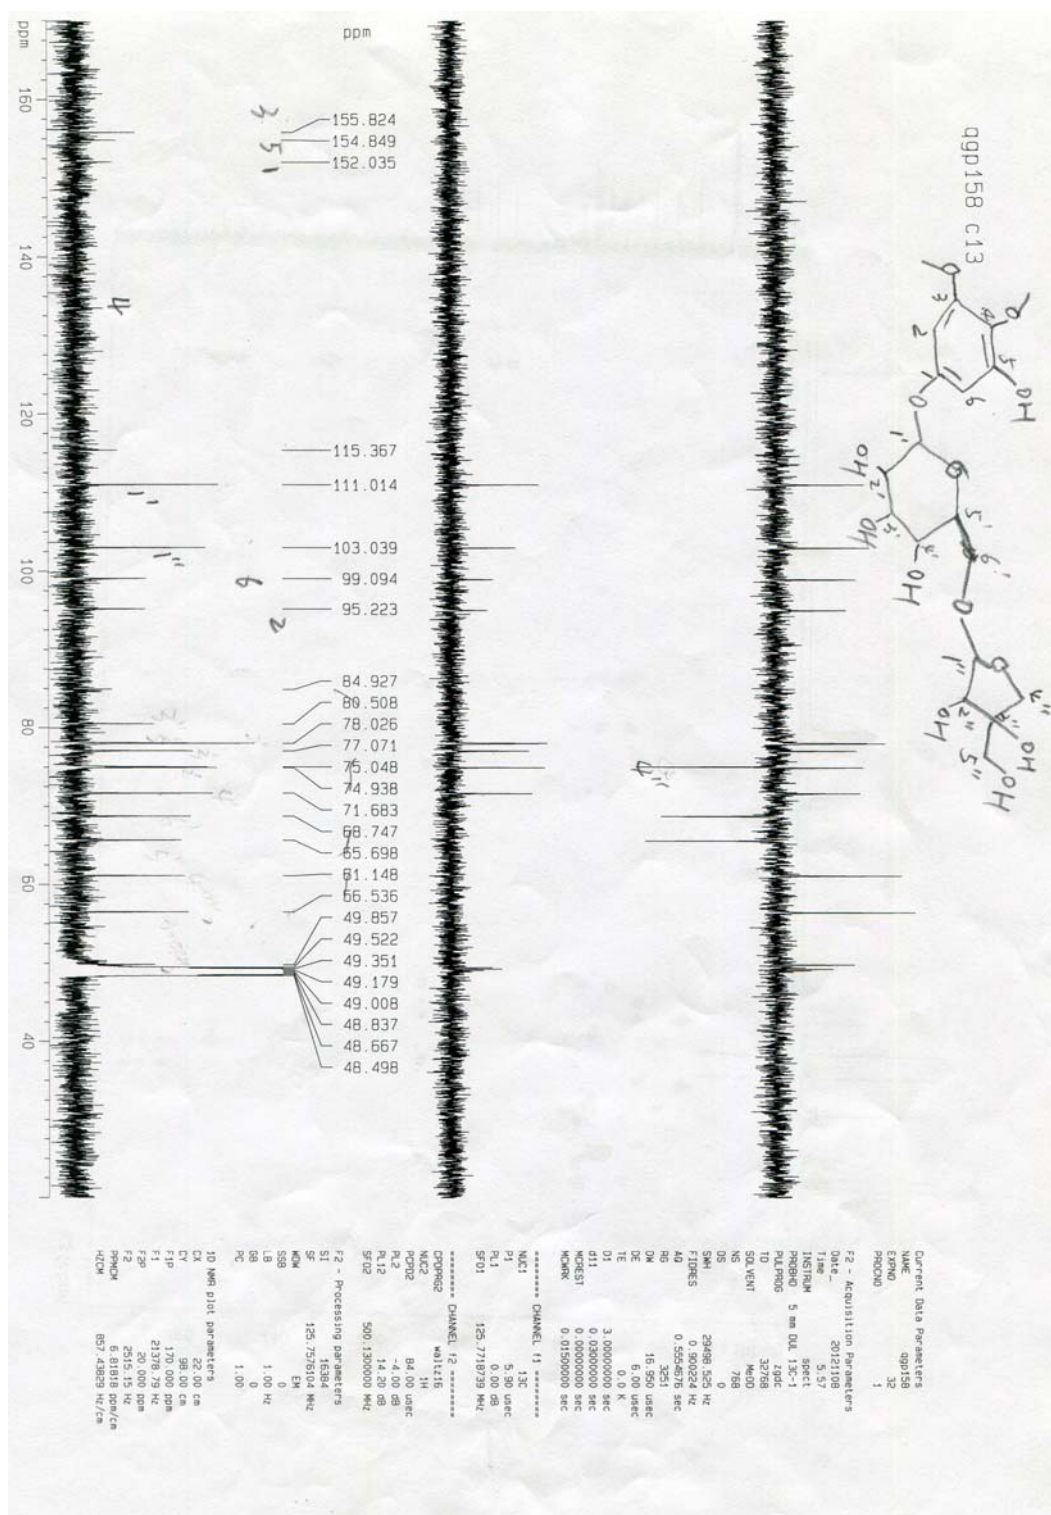

**Figure S15.** HSQC spectrum of compound **3** in CD<sub>3</sub>OD.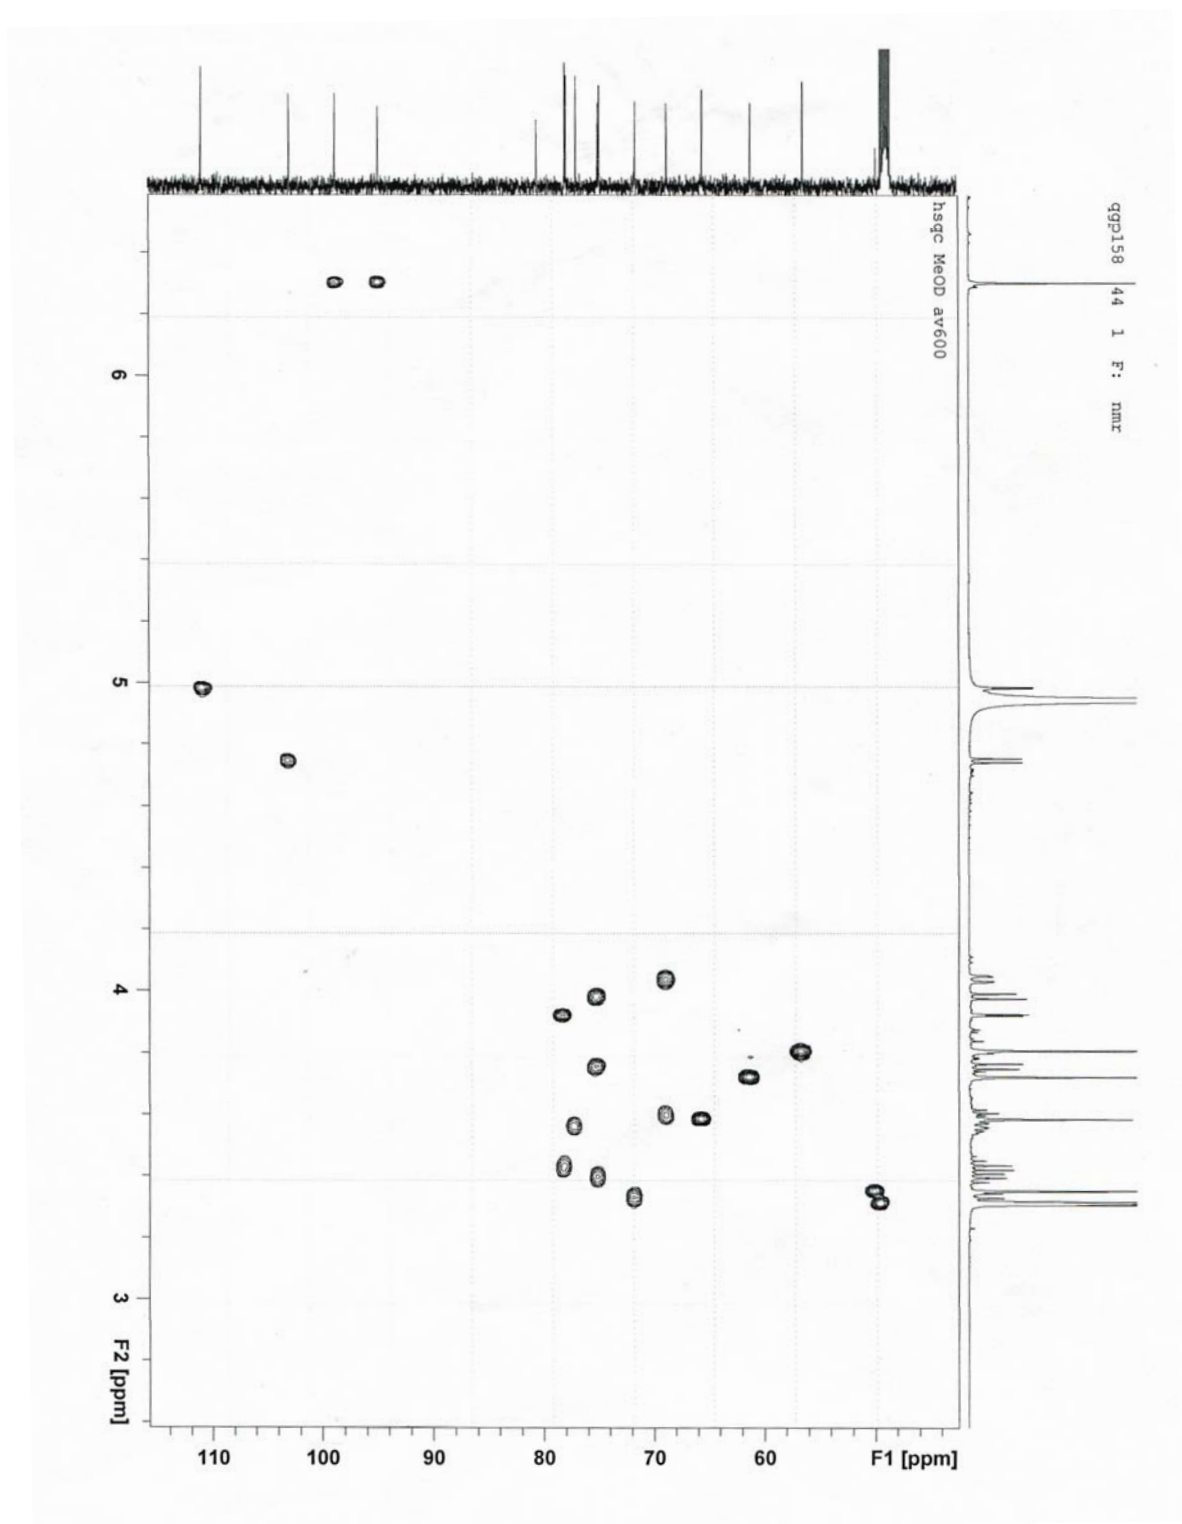

Figure S16. HMBC spectrum of compound **3** in CD<sub>3</sub>OD.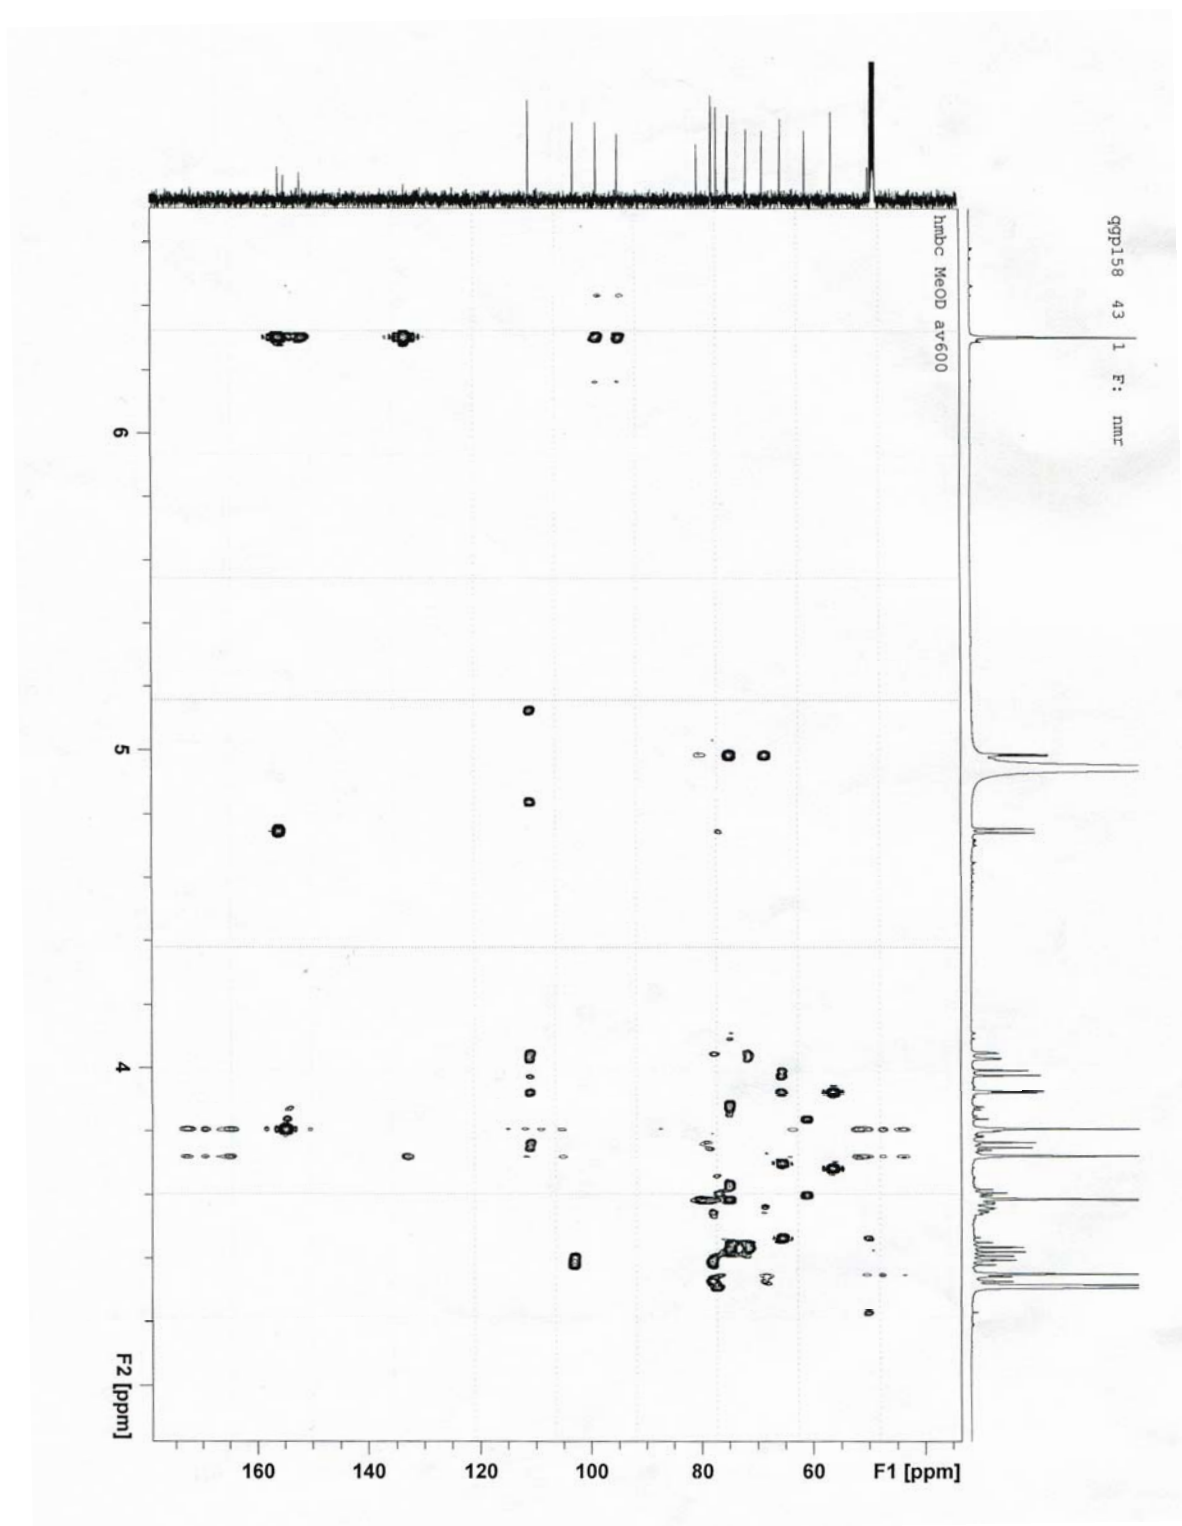

**Figure S17.**  $^1\text{H}$ - $^1\text{H}$  COSY spectrum of compound **3** in  $\text{CD}_3\text{OD}$ .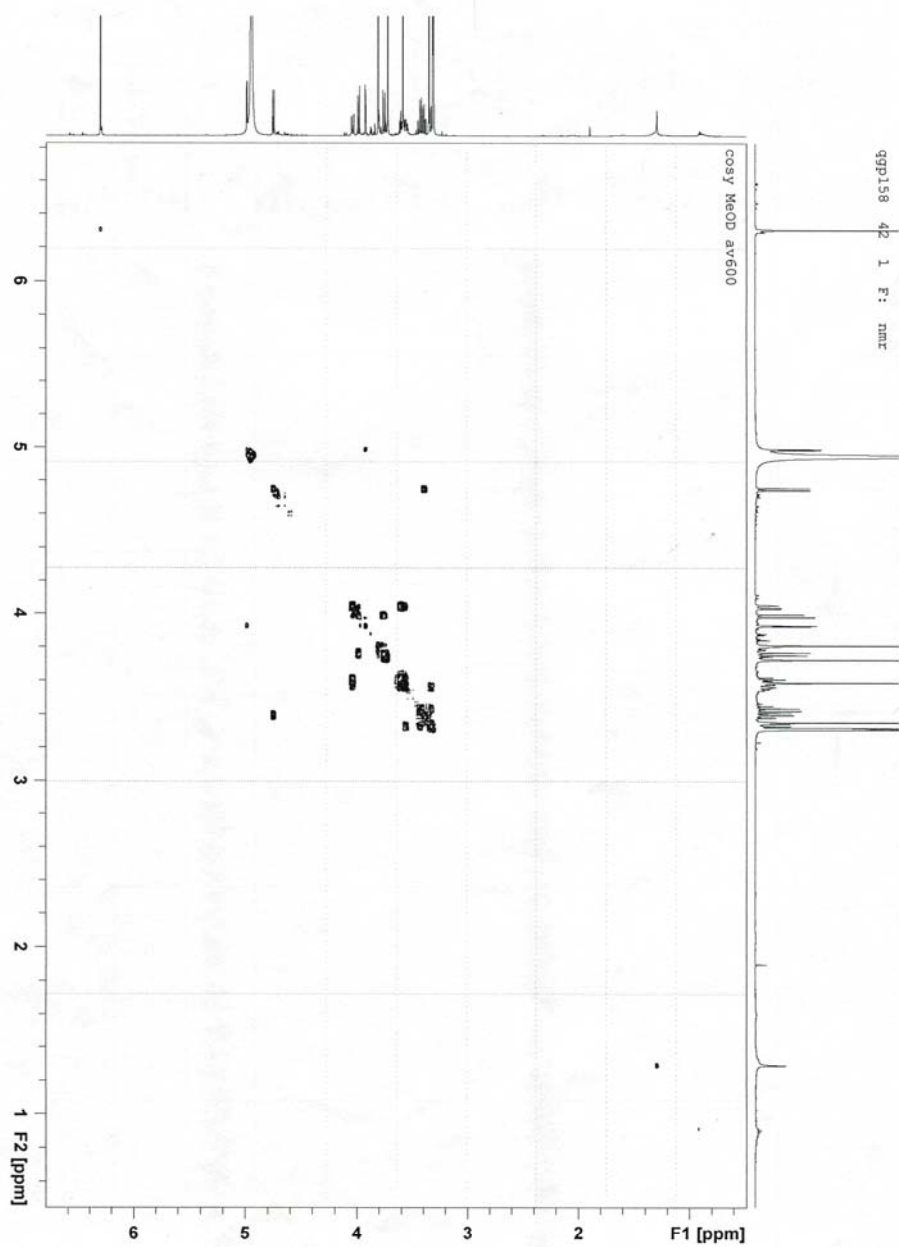

Supplement: s1 [file s1]
